# Supplementary material for: Establishment and Validation of CyberKnife Irradiation in a Syngeneic Glioblastoma Mouse Model
Source: MDPI journal article supplement (doi:10.3390/cancers13143416), 2021-07-08
Supplement: s1 [file s1]

# Supplementary Materials: Establishment and Validation of CyberKnife Irradiation in a Syngeneic Glioblastoma Mouse Model

Claudius Jelgersma, Carolin Senger, Anne Kathrin Kluge, Anastasia Janas, Melina Nieminen-Kelhä, Irina Kremenetskaia, Susanne Mueller, Susan Brandenburg, Franziska Loebel, Ingeborg Tinhofer, Alfredo Conti, Volker Budach, Peter Vajkoczy and Gueliz Acker

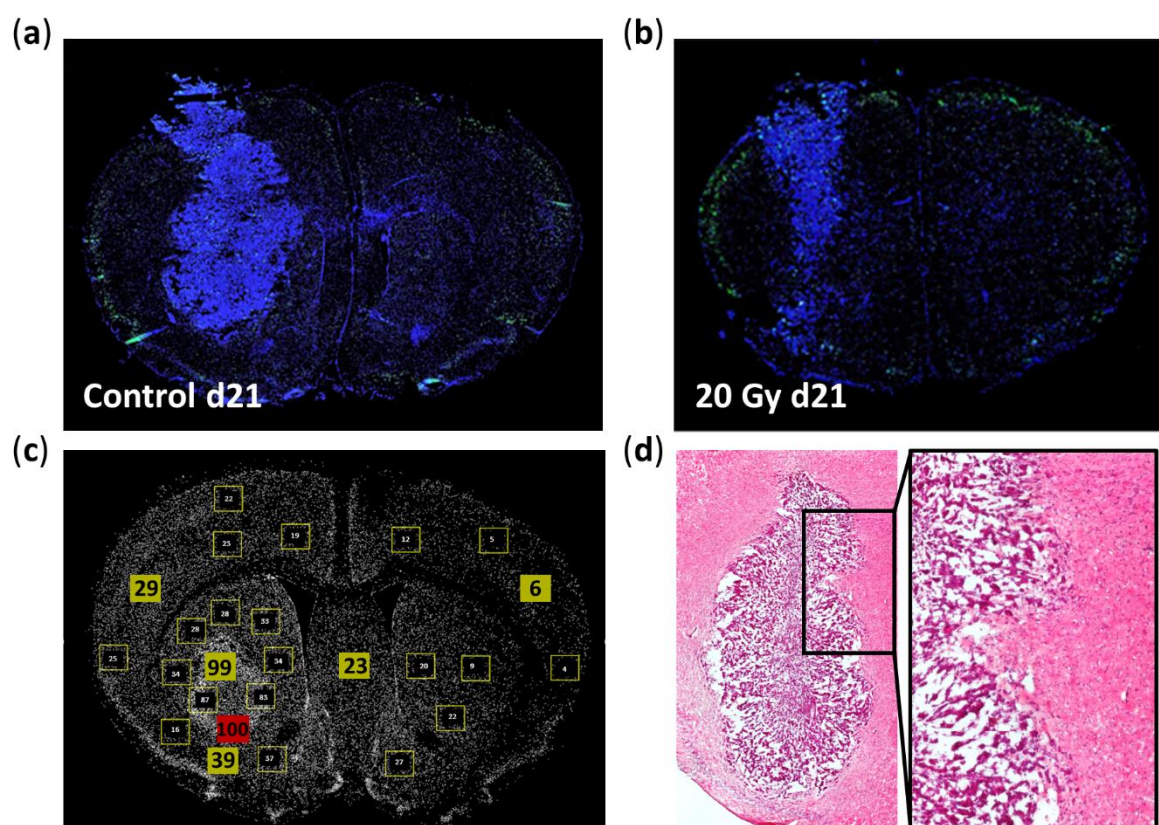

**Figure S1.** Demonstration of  $\gamma$ -H2AX staining and tumor growth characteristics of GL261. (a) Representative  $\gamma$ -H2AX immunostaining image of the non-irradiated tumor (control) on day 21. Unspecific  $\gamma$ -H2AX staining is observed in the cortical and subcortical regions ( $\gamma$ -H2AX: green, DAPI: blue). (b) Representative  $\gamma$ -H2AX immunostaining image on day 21 showing no specific DNA damage in the irradiated area 6 days after irradiation ( $\gamma$ -H2AX: green, DAPI: blue). (c)  $\gamma$ -H2AX intensity was measured 1 h after irradiation in the defined regions of interest (yellow rectangle) and expressed as percentage of the reference intensity (red rectangle). (d) Representative HE staining image of the non-irradiated tumor on day 21 showing the non-infiltrative character of GL261 tumors.
